# Supplementary material
Source: PubMed Central journal article supplement (PMC2790271)
Supplement: NIHMS155384-supplement-01.pdf [file NIHMS155384-supplement-01.pdf]

## **Appendix: Workshop participants**

Workshop participants: Daniel S. Berman, MD, University of California, Los Angeles; Diane Bild, MD, National Heart, Lung, and Blood Institute; Roger S. Blumenthal, MD, Johns Hopkins Hospital; Robert O. Bonow, MD, Feinberg Cardiovascular Research Institute; Ralph G. Brindis, MD, Northern California Kaiser Permanente; Matthew J. Budoff, MD, University of California, Los Angeles; Robert M. Califf, MD, Duke University; Manuel D. Cerqueira, MD, Cleveland Clinic Heart Center; Paul S. Chan, MD, Saint Luke's Health System; Lawton Cooper, MD, National Heart, Lung, and Blood Institute; Pamela S. Douglas, MD, Duke University; Lawrence Fine, MD, National Heart, Lung, and Blood Institute; Mario J. Garcia, MD, Mount Sinai School of Medicine; Philip Greenland, MD, Northwestern University; Paul A. Heidenreich, MD, Stanford University; Marvin Konstam, MD, National Heart, Lung, and Blood Institute; Mike Lauer, MD, National Heart, Lung, and Blood Institute; Frederick A. Masoudi, MD, Denver Health Medical Center; Manesh R. Patel, MD, Duke University; W. Frank Peacock, MD, Cleveland Clinic; Eric D. Peterson, MD, Duke University; Gilbert L. Raff, MD, William Beaumont Hospital; Leslee J. Shaw, PhD, Emory University; Daniel C. Sullivan, MD, Duke University; Allen J. Taylor, MD, Walter Reed Army Medical Center; James E. Udelson, MD, Tufts-New England Medical Center; Pamela Woodard, MD, Washington University.
